# Supplementary material
Source: PubMed Central journal article supplement (PMC2852200)
Supplement: NIHMS184502-supplement-supplemental_material.pdf [file NIHMS184502-supplement-supplemental_material.pdf]

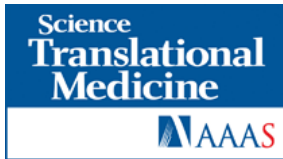

## Supplementary Materials for

### **A $\beta$ -Arrestin–Biased Agonist of the Parathyroid Hormone Receptor (PTH1R) Promotes Bone Formation Independent of G Protein Activation**

Diane Gesty-Palmer, Pat Flannery, Ling Yuan, Leonor Corsino, Robert Spurney, Robert J. Lefkowitz,\* Louis M. Luttrell

\*To whom correspondence should be addressed. E-mail: lefko001@receptor-biol.duke.edu

Published 7 October 2009, *Sci. Transl. Med.* **1**, 1ra1 (2009)  
DOI: 10.1126/scitranslmed.3000071

#### **This PDF file includes:**

- Fig. S1. PTH- $\beta$ arr does not activate  $G_{q/11}$  PI hydrolysis.
- Fig. S2.  $\beta$ -Arrestin2<sup>-/-</sup> mice show no skeletal or size abnormalities.
- Fig. S3. PTH(1–34), but not PTH- $\beta$ arr, increases urinary calcium.

Supplementary Data  
Figs S1-S3

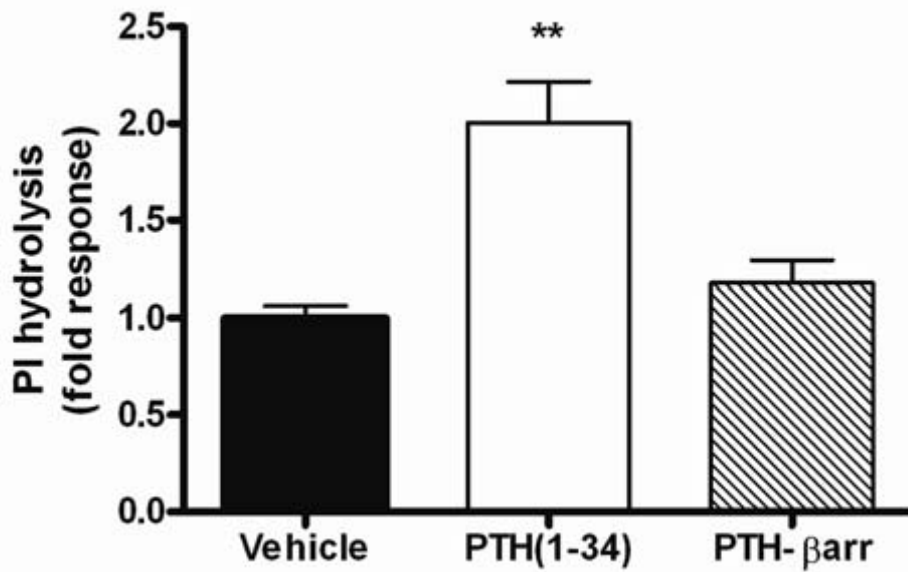

Fig. S1. PTH-βarr does not activate  $G_{q/11}$  PI hydrolysis. PI hydrolysis in response to PTH(1-34) and PTH-βarr stimulation of endogenously expressed PTH1R in WT POBs. Data correspond to the mean  $\pm$  SEM of four independent experiments. (\*\*,  $P < 0.01$  compared with the non-stimulated WT POB using two-tailed unpaired t-test).

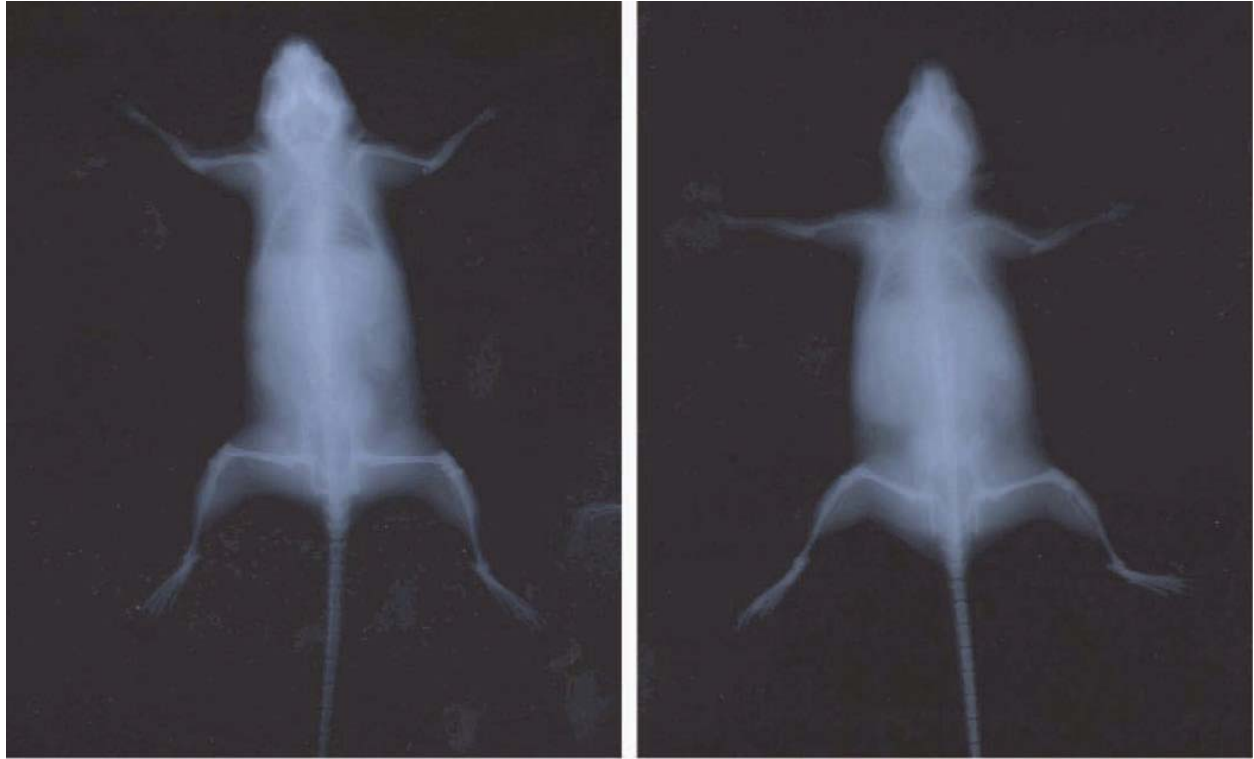

**WT**

**$\beta$ -arrestin<sup>-/-</sup>**

Fig. S2.  $\beta$ -arrestin2<sup>-/-</sup> mice show no skeletal or size abnormalities.  $\beta$ -arrestin2<sup>-/-</sup> and wild type mice were assessed by x-ray and for gross morphological features.

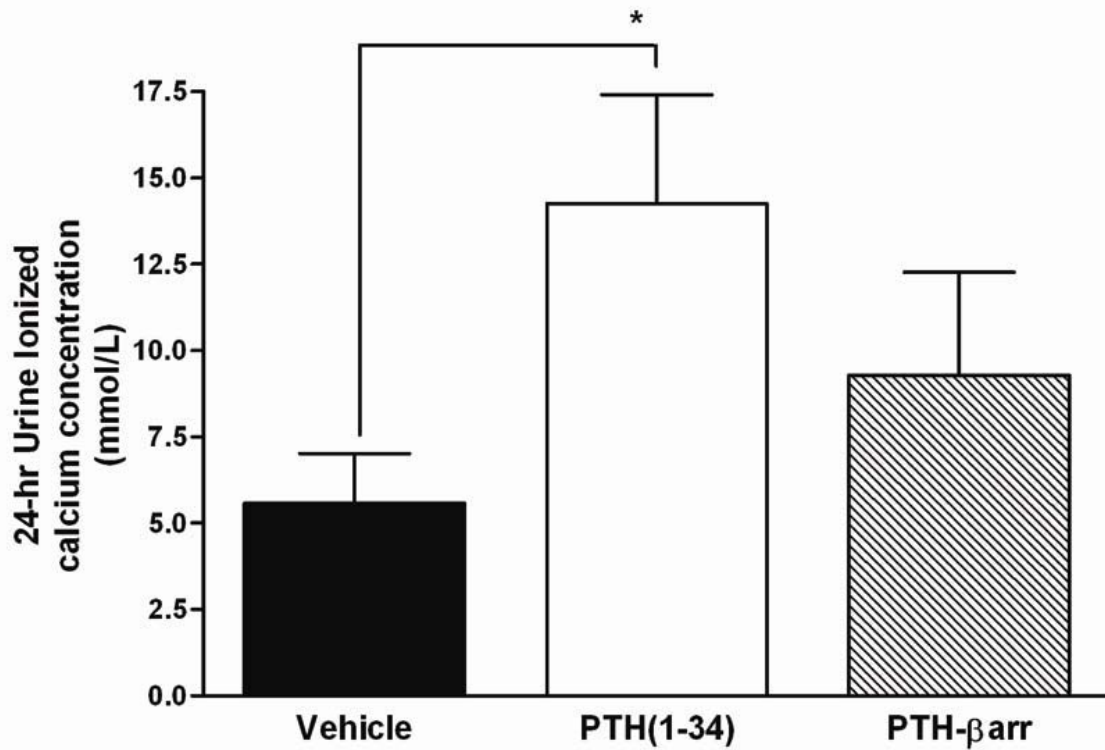

Fig. S3. PTH(1-34), but not PTH-βarr, increases urinary calcium. 24 hour urine calcium concentration was measured in male WT mice after 8 weeks of treatment with vehicle, PTH(1-34) or PTH-βarr. Mice were treated starting at nine weeks of age. Data represent the mean  $\pm$  SEM of measurements taken from at least 7 male mice. (\*,  $P < 0.05$  compared with vehicle treated WT mice; using two-tailed unpaired t-test).
